# Supplementary material
Source: Research Square preprint supplement (doi:10.21203/rs.3.rs-9293749/v1)
Supplement: Supplementary file 1 [file e978746b6d1024ae9985bf35.pdf]

1 Supplement to Observed Diurnal Cycle Change of Tropical Deep  
2 Convection Amplifies Surface Warming

3 Jakob Deutloff<sup>1, 2, 3\*</sup>, Stefan A. Buehler<sup>1, 2</sup>, Julia Windmiller<sup>4</sup>,  
4 Ann Kristin Naumann<sup>5</sup>

5 <sup>1\*</sup>Earth System Sciences, Atmospheric Science, University of Hamburg, Hamburg, Germany.

6 <sup>2</sup>Earth and Society Research Hub (ESRAH), Hamburg, Germany.

7 <sup>3</sup>International Max Planck Research School on Earth System Modelling (IMPRS-ESM),  
8 Hamburg, Germany.

9 <sup>4</sup>Max Planck Institute for Meteorology, Hamburg, Germany.

10 <sup>5</sup>Ludwig-Maximilians-Universität in Munich, Munich, Germany.

11 \*Corresponding author(s). E-mail(s): [jakob.deutloff@uni-hamburg.de](mailto:jakob.deutloff@uni-hamburg.de);

12 Contributing authors: [stefan.buehler@uni-hamburg.de](mailto:stefan.buehler@uni-hamburg.de); [julia.windmiller@mpimet.mpg.de](mailto:julia.windmiller@mpimet.mpg.de);  
13 [a.naumann@lmu.de](mailto:a.naumann@lmu.de);

14 **S1 Relation of Brightness Temperature and Ice Water Path**

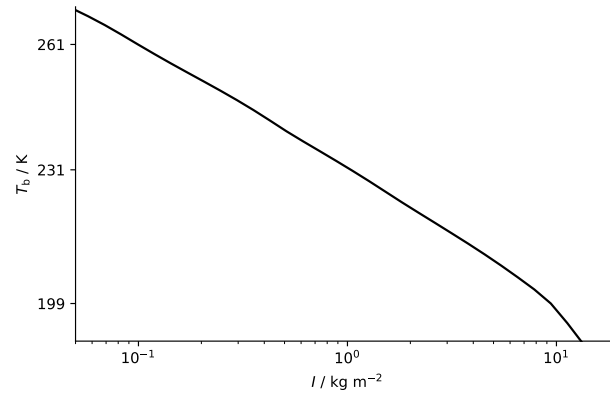

**Fig. S1** Brightness temperature ( $T_b$ ) as a function of ice water path ( $I$ ) derived from the area constraint.

15 **S2 Total Change in Deep Convective Clouds**

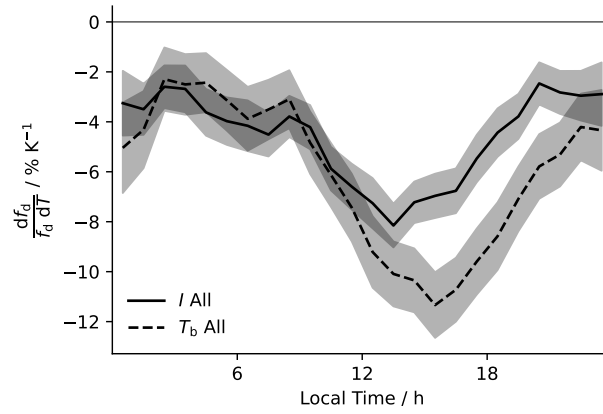

**Fig. S2** Change of the deep convective cloud fraction ( $f_d$ ) with two-meter temperature  $T$  in the tropics diagnosed from brightness temperatures ( $T_b$ ) and ice water path ( $I$ ).

16 **S3 Diurnal Cycle of Radiative Fluxes**

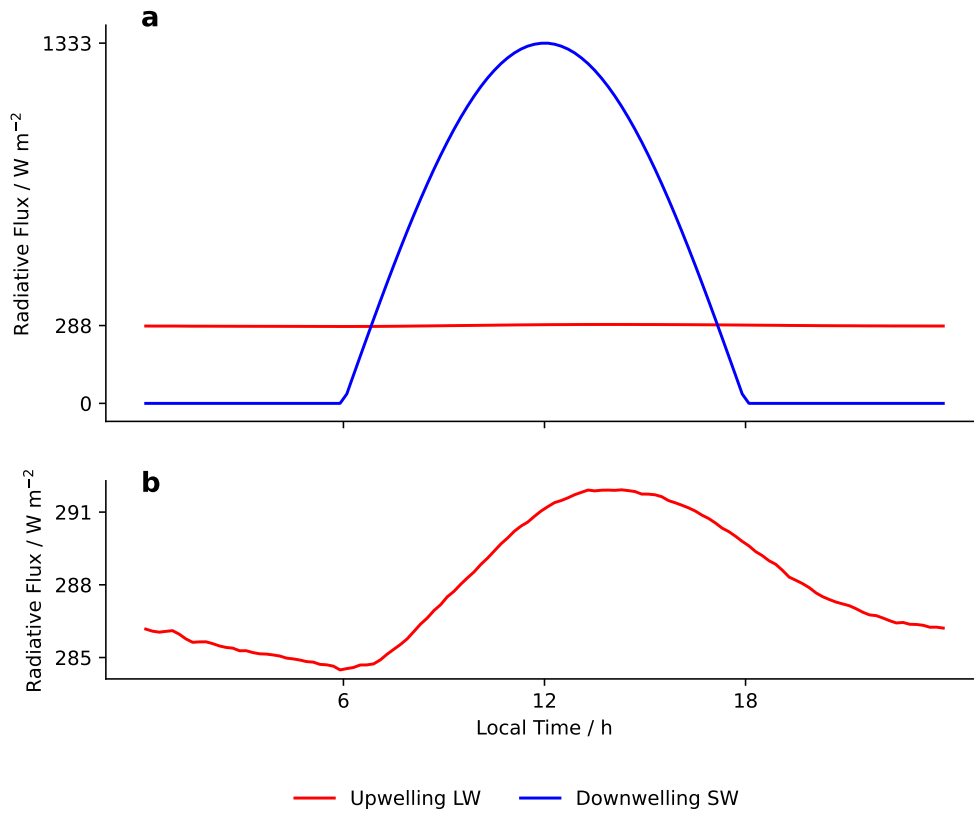

**Fig. S3** (a) Diurnal cycle of the downwelling shortwave (SW) flux and the upwelling longwave (LW) flux in tropical clear-sky regions. (b) Diurnal cycle of only the upwelling LW flux in tropical clear-sky regions.

17 **S4 Albedo**

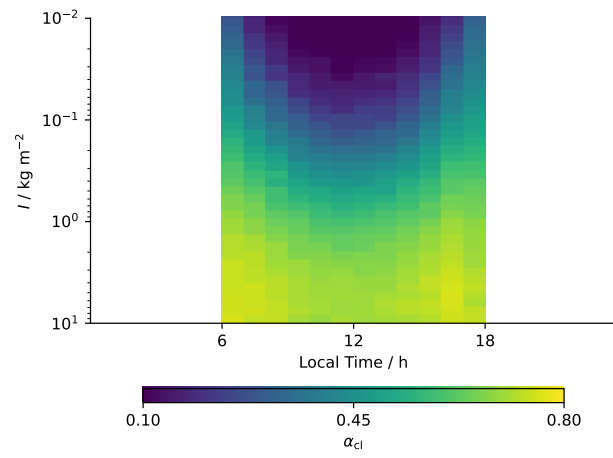

**Fig. S4** Cloud albedo ( $\alpha_{cl}$ ) binned by ice water path ( $I$ ) and local time.

18 **S5 Bootstrapping of Regression**

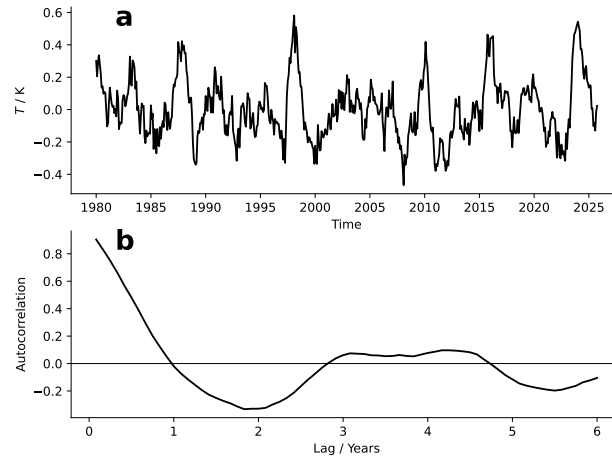

**Fig. S5** a) Deseasonalized and detrended time-series of monthly mean two-meter temperature ( $T$ ) and (b) autocorrelation of  $T$ .

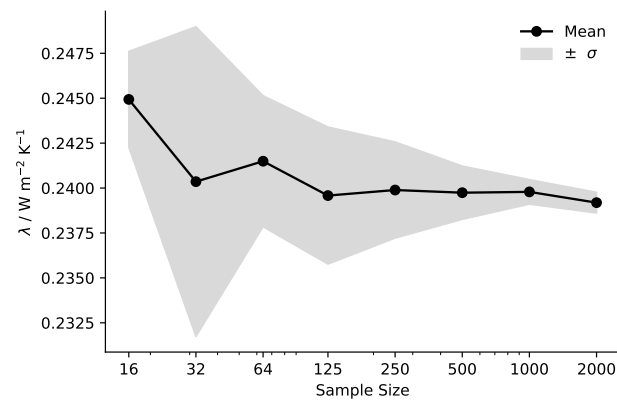

**Fig. S6** Feedback from changes in the diurnal cycle of deep convection ( $\lambda$ ) for different bootstrap sample sizes. Dots mark the mean estimate from five bootstrap samples with the respective sample size. Grey shading visualises the standard deviation of the mean  $\lambda$  from the five samples.
